# Supplementary material for: Human Symmetry Uncertainty Detected by a Self-Organizing Neural Network Map
Source: Preprints.org preprint supplement (doi:10.20944/preprints202101.0313.v1), 2021-01-18
Supplement: Supplementary file 2 [file supplementary]

## Sheet: Feuil1
BLUE2		734.38	859.392	609.386	734.445	953.192	1046.92	609.368	875.004	843.816	921.889	750.011	656.284	734.39	625.037	609.494
BLUE2		1187.56	703.181	765.631	1078.17	984.413	687.508	875.011	843.792	812.492	640.623	937.54	656.257	984.387	1000.01	937.622
BLUE4		984.383	984.445	953.137	1000.01	1281.29	1078.22	765.633	937.51	1125.01	812.57	1140.62	1046.94	1296.88	796.885	843.759
BLUE4		843.819	1265.64	1171.87	781.301	1125.01	1031.26	921.867	1000.01	703.136	890.633	828.156	937.569	1234.44	1109.39	812.512
BLUE3		1062.55	750.011	937.514	1343.81	968.76	859.4	1218.76	906.262	921.943	687.537	734.441	1031.27	1109.37	1046.93	859.383
BLUE3		1218.76	859.45	1203.25	1062.57	937.568	999.991	765.699	906.247	937.54	812.558	1015.64	953.135	1109.39	1312.52	750.106
BLUE1		750.067	531.261	546.91	609.412	828.163	859.368	749.994	531.29	765.633	718.751	765.617	765.636	671.883	546.882	828.135
BLUE1		828.191	718.854	515.635	609.382	781.261	1028.14	437.505	656.261	828.133	562.577	749.992	968.738	750.034	625.037	656.248
MultiCol1		1593.76	1187.64	1359.39	687.558	1406.26	765.634	1343.83	1046.89	1046.92	906.266	734.383	906.247	1687.52	1250	1015.64
MultiCol1		1687.58	1234.45	1125.04	1125.11	1625.02	1734.39	1234.39	828.138	1296.89	1203.22	1328.17	1531.28	1437.51	1390.79	1156.37
RED1		515.63	796.882	531.268	578.128	765.695	640.638	515.634	750.005	515.63	578.141	625.013	562.544	796.883	562.51	578.161
RED1		515.64	578.191	765.638	500.005	468.759	578.137	515.66	781.354	500.006	734.41	593.756	672.207	671.882	625.035	875.012
RED2		1203.15	906.26	625.071	593.802	578.167	859.447	625.036	656.243	781.262	906.264	640.632	937.548	828.133	828.116	765.636
RED2		609.382	625.005	531.256	999.997	515.635	687.489	734.382	875.012	640.631	984.46	625.017	734.388	796.884	734.389	734.39
RED4		1296.89	1234.4	625.009	1359.39	953.135	1281.25	921.886	937.516	937.516	953.142	1234.37	1046.91	1156.27	1172	953.138
RED4		1453.14	1031.27	1171.92	1140.62	1421.9	1312.58	1156.29	1109.39	1000.01	1031.29	1171.89	1171.89	1203.12	1031.24	1312.65
RED3		1203.2	1125.01	1031.26	1031.29	875.012	1062.54	906.271	906.265	968.762	875.013	1234.39	1234.39	984.412	765.635	1203.14
RED3		1359.39	875.009	1015.67	1375	875.11	1000.02	875.009	921.885	859.382	593.795	968.807	859.411	1297	937.621	859.386
MultiCol2		1375	1265.7	1296.9	1468.75	843.751	1453.13	1109.37	1171.87	1140.64	1203.14	1390.62	1406.36	1515.65	1687.51	1484.39
MultiCol2		1671.87	1140.64	1375.17	1343.82	609.382	1515.74	781.249	1343.77	1578.14	1203.13	1531.29	1750.02	718.761	1218.77	1750
